# Supplementary material for: Temporal trends of psychiatric disorders incidence by sex, education and immigration status among young and middle-aged adults in Sweden, 2004–2019
Source: Springer Nature journal article supplement (doi:10.1186/s12888-025-06596-8), 2025-02-25
Supplement: MOESM1 [file 12888_2025_6596_MOESM1_ESM.pdf]

**Table A1. Temporal changes in age-standardized rates of substance use disorders across sociodemographic strata defined by nativity, sex, and education, 2004–2019.**

| Stratum                                                   | Period 1  | APC 1             | Period 2  | APC 2             | AAPC (2004–2019)  |
|-----------------------------------------------------------|-----------|-------------------|-----------|-------------------|-------------------|
| First-generation immigrant males with low education       | 2004–2019 | -3.4 (-4.4, -2.2) |           |                   | -3.4 (-4.4, -2.2) |
| First-generation immigrant males with medium education    | 2004–2007 | 8.6 (-3.3, 24.7)  | 2007–2019 | -3.0 (-6.9, -1.1) | -0.8 (-2.9, 1.9)  |
| First-generation immigrant males with high education      | 2004–2010 | 3.9 (0.8, 14.7)   | 2010–2019 | -2.7 (-4.1, -1.7) | -0.1 (-1.0, 1.9)  |
| First-generation immigrant females with low education     | 2004–2007 | 17.0 (0.5, 36.6)  | 2007–2019 | -5.1 (-9.0, -3.4) | -1.0 (-3.3, 1.9)  |
| First-generation immigrant females with medium education  | 2004–2008 | 11.4 (3.5, 28.9)  | 2008–2019 | -3.7 (-5.0, -2.7) | 0.1 (-1.2, 2.4)   |
| First-generation immigrant females with high education    | 2004–2019 | -1.6 (-3.1, 0.6)  |           |                   | -1.6 (-3.1, 0.6)  |
| Second-generation immigrant males with low education      | 2004–2019 | -2.1 (-3.6, -0.5) |           |                   | -2.1 (-3.6, -0.5) |
| Second-generation immigrant males with medium education   | 2004–2019 | -1.7 (-2.5, -0.6) |           |                   | -1.7 (-2.5, -0.6) |
| Second-generation immigrant males with high education     | 2004–2011 | 7.5 (2.9, 35.4)   | 2011–2019 | -1.7 (-6.9, 0.6)  | 2.5 (0.5, 7.2)    |
| Second-generation immigrant females with low education    | 2004–2009 | 9.1 (4.1, 21.0)   | 2009–2019 | -2.5 (-4.5, -1.3) | 1.2 (-0.0, 3.2)   |
| Second-generation immigrant females with medium education | 2004–2014 | 3.3 (1.8, 8.3)    | 2014–2019 | -4.0 (-9.2, -0.8) | 0.8 (-0.2, 2.6)   |
| Second-generation immigrant females with high education   | 2004–2019 | 0.0 (-1.8, 2.8)   |           |                   | 0.0 (-1.8, 2.8)   |
| Native male low education                                 | 2004–2010 | 2.6 (0.4, 12.2)   | 2010–2019 | -1.3 (-5.2, -0.3) | 0.2 (-0.9, 1.8)   |
| Native male medium education                              | 2004–2008 | 4.8 (0.7, 13.1)   | 2008–2019 | -2.0 (-2.8, -1.5) | -0.3 (-1.0, 0.9)  |
| Native male high education                                | 2004–2010 | 6.5 (3.1, 22.5)   | 2010–2019 | 0.9 (-2.0, 2.1)   | 3.1 (1.9, 5.7)    |
| Native female low education                               | 2004–2008 | 4.7 (0.1, 14.7)   | 2008–2019 | -0.9 (-4.7, 0.0)  | 0.5 (-0.8, 2.1)   |
| Native female medium education                            | 2004–2015 | 2.4 (1.8, 3.9)    | 2015–2019 | -2.8 (-6.2, -0.6) | 1.0 (0.5, 1.8)    |
| Native female high education                              | 2004–2016 | 2.9 (2.0, 12.5)   | 2016–2019 | -4.7 (-9.5, 0.7)  | 1.4 (0.5, 4.0)    |

APC: Annual percentage change; AAPC: Average annual percent change.

Numbers in parentheses show 95% confidence intervals.

**Table A2. Temporal changes in age-standardized rates of schizophrenia and acute and transient psychotic disorders across sociodemographic strata defined by nativity, sex, and education, 2004-2019.**

| Stratum                                                   | Period 1  | APC 1               | Period 2  | APC 2                | Period 3  | APC 3            | AAPC (2004–2019)   |
|-----------------------------------------------------------|-----------|---------------------|-----------|----------------------|-----------|------------------|--------------------|
| First-generation immigrant males with low education       | 2004–2014 | -10.8 (-19.4, -8.1) | 2014–2019 | -1.0 (-6.8, 9.4)     |           |                  | -7.7 (-9.9, -5.8)  |
| First-generation immigrant males with medium education    | 2004–2007 | 25.5 (7.6, 44.5)    | 2007–2011 | -19.8 (-25.4, -11.3) | 2011–2019 | -2.1 (-5.3, 7.5) | -2.5 (-4.4, 0.1)   |
| First-generation immigrant males with high education      | 2004–2012 | -12.5 (-27.1, -6.9) | 2012–2019 | -2.6 (-7.2, 8.8)     |           |                  | -8.0 (-10.7, -5.1) |
| First-generation immigrant females with low education     | 2004–2019 | -6.8 (-8.6, -4.8)   |           |                      |           |                  | -6.8 (-8.6, -4.8)  |
| First-generation immigrant females with medium education  | 2004–2019 | -6.8 (-9.2, -3.9)   |           |                      |           |                  | -6.8 (-9.2, -3.9)  |
| First-generation immigrant females with high education    | 2004–2007 | 16.9 (-2.5, 40.6)   | 2007–2019 | -7.1 (-14.8, -4.7)   |           |                  | -2.7 (-5.8, 0.7)   |
| Second-generation immigrant males with low education      | 2004–2012 | -8.3 (-18.4, -4.0)  | 2012–2019 | 3.5 (-0.6, 13.9)     |           |                  | -3.0 (-5.2, -0.9)  |
| Second-generation immigrant males with medium education   | 2004–2013 | -6.9 (-19.3, -2.7)  | 2013–2019 | 4.9 (-0.9, 18.5)     |           |                  | -2.4 (-5.1, 0.1)   |
| Second-generation immigrant males with high education     | 2004–2014 | -6.4 (-23.9, 15.1)  | 2014–2019 | 7.5 (-5.4, 30.5)     |           |                  | -2.0 (-5.6, 2.2)   |
| Second-generation immigrant females with low education    | 2004–2019 | -4.0 (-6.8, -1.2)   |           |                      |           |                  | -4.0 (-6.8, -1.2)  |
| Second-generation immigrant females with medium education | 2004–2019 | -4.9 (-7.8, -1.7)   |           |                      |           |                  | -4.9 (-7.8, -1.7)  |
| Second-generation immigrant females with high education   | 2004–2019 | -3.5 (-8.4, 2.4)    |           |                      |           |                  | -3.5 (-8.4, 2.4)   |
| Native male low education                                 | 2004–2011 | -7.7 (-12.7, -4.6)  | 2011–2019 | 0.9 (-1.2, 5.3)      |           |                  | -3.2 (-4.4, -1.9)  |
| Native male medium education                              | 2004–2010 | -12.5 (-23.5, -6.1) | 2010–2019 | -0.1 (-2.5, 5.9)     |           |                  | -5.3 (-7.2, -2.9)  |
| Native male high education                                | 2004–2012 | -10.0 (-18.6, -6.3) | 2012–2019 | 0.3 (-3.1, 8.3)      |           |                  | -5.3 (-7.2, -3.5)  |
| Native female low education                               | 2004–2008 | -14.8 (-27.8, -1.7) | 2008–2019 | -0.5 (-6.8, 12.6)    |           |                  | -4.6 (-6.8, -1.1)  |
| Native female medium education                            | 2004–2011 | -10.0 (-20.9, -5.5) | 2011–2019 | -1.8 (-4.8, 6.9)     |           |                  | -5.7 (-8.0, -3.6)  |
| Native female high education                              | 2004–2016 | -6.0 (-12.7, 0.7)   | 2016–2019 | 4.9 (-4.7, 10.7)     |           |                  | -3.9 (-5.9, -2.4)  |

APC: Annual percentage change; AAPC: Average annual percent change.

Numbers in parentheses show 95% confidence intervals.

**Table A3. Temporal changes in age-standardized rates of depressive disorders across sociodemographic strata defined by nativity, sex, and education, 2004-2019.**

| Stratum                                                   | Period 1  | APC 1             | Period 2  | APC 2                | Period 3  | APC 3                | AAPC (2004–2019)   |
|-----------------------------------------------------------|-----------|-------------------|-----------|----------------------|-----------|----------------------|--------------------|
| First-generation immigrant males with low education       | 2004–2014 | -4.9 (-7.0, 8.2)  | 2014–2019 | -15.5 (-26.6, -10.1) |           |                      | -8.5 (-10.7, -4.8) |
| First-generation immigrant males with medium education    | 2004–2019 | -6.5 (-7.9, -4.9) |           |                      |           |                      | -6.5 (-7.9, -4.9)  |
| First-generation immigrant males with high education      | 2004–2019 | -6.8 (-8.2, -5.0) |           |                      |           |                      | -6.8 (-8.2, -5.0)  |
| First-generation immigrant females with low education     | 2004–2007 | 15.8 (2.1, 33.4)  | 2007–2014 | -7.0 (-10.0, -4.0)   | 2014–2019 | -16.3 (-24.4, -13.0) | -6.2 (-8.3, -3.7)  |
| First-generation immigrant females with medium education  | 2004–2014 | -3.8 (-5.2, -0.6) | 2014–2019 | -12.2 (-17.6, -9.0)  |           |                      | -6.7 (-7.8, -5.3)  |
| First-generation immigrant females with high education    | 2004–2007 | 16.2 (-4.8, 38.3) | 2007–2019 | -7.6 (-10.5, -6.3)   |           |                      | -3.2 (-6.6, 0.0)   |
| Second-generation immigrant males with low education      | 2004–2008 | 10.2 (1.7, 26.4)  | 2008–2019 | -1.6 (-4.7, -0.3)    |           |                      | 1.4 (-0.4, 3.8)    |
| Second-generation immigrant males with medium education   | 2004–2019 | -2.2 (-3.1, -1.1) |           |                      |           |                      | -2.2 (-3.1, -1.1)  |
| Second-generation immigrant males with high education     | 2004–2014 | 2.1 (-0.2, 28.1)  | 2014–2019 | -8.2 (-19.1, -2.9)   |           |                      | -1.5 (-3.5, 4.4)   |
| Second-generation immigrant females with low education    | 2004–2007 | 11.8 (2.2, 23.1)  | 2007–2016 | -1.1 (-2.7, 0.5)     | 2016–2019 | -13.4 (-17.9, -7.8)  | -1.3 (-2.9, 0.6)   |
| Second-generation immigrant females with medium education | 2004–2014 | 0.3 (-2.4, 27.6)  | 2014–2019 | -6.3 (-18.1, -1.3)   |           |                      | -2.0 (-4.1, 2.9)   |
| Second-generation immigrant females with high education   | 2004–2015 | -0.8 (-2.0, 2.1)  | 2015–2019 | -10.1 (-15.7, -5.9)  |           |                      | -3.4 (-4.4, -1.9)  |
| Native male low education                                 | 2004–2014 | 2.9 (1.5, 14.5)   | 2014–2019 | -3.9 (-12.7, -0.1)   |           |                      | 0.6 (-1.0, 3.2)    |
| Native male medium education                              | 2004–2007 | 10.6 (-0.7, 25.1) | 2007–2019 | -2.3 (-5.1, -1.4)    |           |                      | 0.1 (-1.9, 2.5)    |
| Native male high education                                | 2004–2014 | 1.6 (0.0, 16.3)   | 2014–2019 | -5.7 (-13.3, -2.0)   |           |                      | -0.9 (-2.3, 2.6)   |
| Native female low education                               | 2004–2007 | 12.6 (1.9, 23.8)  | 2007–2019 | -2.1 (-4.0, -1.3)    |           |                      | 0.6 (-0.9, 2.4)    |
| Native female medium education                            | 2004–2007 | 15.1 (-0.4, 34.6) | 2007–2019 | -3.3 (-6.9, -2.1)    |           |                      | 0.2 (-2.6, 3.1)    |
| Native female high education                              | 2004–2014 | 0.1 (-1.5, 3.2)   | 2014–2019 | -9.5 (-14.5, -6.4)   |           |                      | -3.2 (-4.3, -1.8)  |

APC: Annual percentage change; AAPC: Average annual percent change.

Numbers in parentheses show 95% confidence intervals.

**Table A4. Temporal changes in age-standardized rates of anxiety disorders across sociodemographic strata defined by nativity, sex, and education, 2004-2019.**

| Stratum                                                   | Period 1  | APC 1             | Period 2  | APC 2               | Period 3  | APC 3               | AAPC (2004–2019)  |
|-----------------------------------------------------------|-----------|-------------------|-----------|---------------------|-----------|---------------------|-------------------|
| First-generation immigrant males with low education       | 2004–2015 | -3.5 (-4.9, 7.8)  | 2015–2019 | -10.4 (-16.8, -5.6) |           |                     | -5.4 (-6.6, -2.9) |
| First-generation immigrant males with medium education    | 2004–2014 | -2.2 (-3.9, 10.5) | 2014–2019 | -7.2 (-13.4, -3.9)  |           |                     | -3.9 (-5.2, -1.3) |
| First-generation immigrant males with high education      | 2004–2019 | -4.1 (-5.1, -2.5) |           |                     |           |                     | -4.1 (-5.1, -2.5) |
| First-generation immigrant females with low education     | 2004–2007 | 9.6 (0.1, 22.4)   | 2007–2015 | -3.9 (-5.8, -1.8)   | 2015–2019 | -12.3 (-18.1, -9.2) | -3.7 (-5.2, -1.7) |
| First-generation immigrant females with medium education  | 2004–2014 | -0.8 (-2.1, 7.2)  | 2014–2019 | -6.9 (-12.4, -3.7)  |           |                     | -2.9 (-3.9, -0.8) |
| First-generation immigrant females with high education    | 2004–2014 | -0.6 (-1.6, 9.6)  | 2014–2019 | -4.9 (-8.8, -2.6)   |           |                     | -2.0 (-2.8, 0.2)  |
| Second-generation immigrant males with low education      | 2004–2014 | 3.4 (1.3, 9.7)    | 2014–2019 | -7.9 (-17.0, -2.8)  |           |                     | -0.5 (-2.4, 1.9)  |
| Second-generation immigrant males with medium education   | 2004–2019 | -0.2 (-1.2, 1.0)  |           |                     |           |                     | -0.2 (-1.2, 1.0)  |
| Second-generation immigrant males with high education     | 2004–2019 | 1.1 (-0.4, 3.2)   |           |                     |           |                     | 1.1 (-0.4, 3.2)   |
| Second-generation immigrant females with low education    | 2004–2007 | 19.1 (1.7, 41.3)  | 2007–2019 | -1.7 (-6.4, -0.3)   |           |                     | 2.1 (-0.9, 5.3)   |
| Second-generation immigrant females with medium education | 2004–2019 | 1.2 (-0.5, 3.3)   |           |                     |           |                     | 1.2 (-0.5, 3.3)   |
| Second-generation immigrant females with high education   | 2004–2016 | 4.3 (2.3, 28.9)   | 2016–2019 | -2.9 (-9.7, 3.5)    |           |                     | 2.8 (1.6, 7.5)    |
| Native male low education                                 | 2004–2014 | 2.7 (1.5, 9.4)    | 2014–2019 | -3.5 (-10.4, -0.1)  |           |                     | 0.6 (-0.6, 2.5)   |
| Native male medium education                              | 2004–2015 | 1.1 (0.1, 13.3)   | 2015–2019 | -2.9 (-8.3, 0.2)    |           |                     | 0.0 (-0.9, 2.5)   |
| Native male high education                                | 2004–2014 | 4.5 (3.1, 12.4)   | 2014–2019 | -2.2 (-8.1, 0.8)    |           |                     | 2.2 (1.1, 4.7)    |
| Native female low education                               | 2004–2007 | 10.6 (0.3, 23.8)  | 2007–2019 | -1.2 (-6.5, -0.1)   |           |                     | 1.1 (-1.2, 3.1)   |
| Native female medium education                            | 2004–2019 | 0.7 (-0.5, 2.2)   |           |                     |           |                     | 0.7 (-0.5, 2.2)   |
| Native female high education                              | 2004–2016 | 3.6 (0.5, 27.8)   | 2016–2019 | -1.7 (-8.3, 4.4)    |           |                     | 2.5 (1.5, 7.1)    |

APC: Annual percentage change; AAPC: Average annual percent change.

Numbers in parentheses show 95% confidence intervals.

**Table A5. Temporal changes in age-standardized rates of personality disorders across sociodemographic strata defined by nativity, sex, and education, 2004-2019.**

| Stratum                                                   | Period 1  | APC 1             | Period 2  | APC 2                | Period 3  | APC 3               | AAPC (2004–2019)   |
|-----------------------------------------------------------|-----------|-------------------|-----------|----------------------|-----------|---------------------|--------------------|
| First-generation immigrant males with low education       | 2004–2007 | 18.7 (2.8, 40.1)  | 2007–2013 | -7.6 (-17.8, -2.4)   | 2013–2019 | -16.6 (-29.0, -9.3) | -6.8 (-9.5, -4.1)  |
| First-generation immigrant males with medium education    | 2004–2007 | 15.3 (-2.2, 36.0) | 2007–2019 | -7.4 (-15.3, -5.4)   |           |                     | -3.2 (-6.4, -0.2)  |
| First-generation immigrant males with high education      | 2004–2009 | 13.1 (-1.9, 26.8) | 2009–2019 | -8.4 (-22.4, -4.8)   |           |                     | -1.7 (-6.9, 6.5)   |
| First-generation immigrant females with low education     | 2004–2015 | -4.2 (-5.9, -1.0) | 2015–2019 | -19.4 (-28.9, -12.0) |           |                     | -8.5 (-10.2, -6.7) |
| First-generation immigrant females with medium education  | 2004–2019 | -6 (-8.4, -3.2)   |           |                      |           |                     | -6 (-8.4, -3.2)    |
| First-generation immigrant females with high education    | 2004–2007 | 44.8 (8.0, 85.1)  | 2007–2019 | -6.4 (-10.6, -3.8)   |           |                     | 2.1 (-1.8, 6.9)    |
| Second-generation immigrant males with low education      | 2004–2019 | -1.5 (-4.5, 1.7)  |           |                      |           |                     | -1.5 (-4.5, 1.7)   |
| Second-generation immigrant males with medium education   | 2004–2019 | -5.5 (-8.1, -2.4) |           |                      |           |                     | -5.5 (-8.1, -2.4)  |
| Second-generation immigrant males with high education     | 2004–2008 | 17.5 (0.3, 64.1)  | 2008–2019 | -3.3 (-10.3, -1.0)   |           |                     | 1.9 (-2.2, 7.6)    |
| Second-generation immigrant females with low education    | 2004–2010 | 9.2 (-0.3, 48.7)  | 2010–2019 | -8.9 (-22.4, -4.8)   |           |                     | -2 (-6.6, 3.5)     |
| Second-generation immigrant females with medium education | 2004–2007 | 15.8 (-1.0, 36.9) | 2007–2019 | -2.6 (-7.3, -1.1)    |           |                     | 0.8 (-2.3, 4.1)    |
| Second-generation immigrant females with high education   | 2004–2008 | 26.3 (7.6, 59.9)  | 2008–2019 | -3 (-8.7, 0.1)       |           |                     | 4.1 (0.8, 8.0)     |
| Native male low education                                 | 2004–2014 | 0.6 (-1.2, 6.7)   | 2014–2019 | -9.2 (-19.0, -4.2)   |           |                     | -2.8 (-4.6, -0.6)  |
| Native male medium education                              | 2004–2019 | -3.6 (-4.9, -2.1) |           |                      |           |                     | -3.6 (-4.9, -2.1)  |
| Native male high education                                | 2004–2019 | -2.2 (-3.6, -0.4) |           |                      |           |                     | -2.2 (-3.6, -0.4)  |
| Native female low education                               | 2004–2007 | 14.6 (2.9, 25.3)  | 2007–2019 | -3.1 (-5.3, -1.9)    |           |                     | 0.2 (-1.5, 1.8)    |
| Native female medium education                            | 2004–2007 | 17.2 (2.0, 36.0)  | 2007–2019 | -1.5 (-4.3, -0.4)    |           |                     | 2 (-0.4, 4.8)      |
| Native female high education                              | 2004–2016 | 0.7 (-0.2, 4.9)   | 2016–2019 | -8.2 (-12.8, -2.1)   |           |                     | -1.2 (-2, 0.7)     |

APC: Annual percentage change; AAPC: Average annual percent change.

Numbers in parentheses show 95% confidence intervals.

**Table A6. Temporal changes in age-standardized rates of autism spectrum disorders and other pervasive developmental disorders across sociodemographic strata defined by nativity, sex, and education, 2004-2019.**

| Stratum                                                   | Period 1  | APC 1              | Period 2  | APC 2               | Period 3  | APC 3              | AAPC (2004–2019)  |
|-----------------------------------------------------------|-----------|--------------------|-----------|---------------------|-----------|--------------------|-------------------|
| First-generation immigrant males with low education       | 2004–2014 | 9.0 (4.1, 25.6)    | 2014–2019 | -15.9 (-32.8, -5.5) |           |                    | 0.0 (-4.1, 6.2)   |
| First-generation immigrant males with medium education    | 2004–2010 | 27.4 (14.5, 72.0)  | 2010–2019 | -2 (-9.4, 2.2)      |           |                    | 8.8 (5.2, 15.8)   |
| First-generation immigrant males with high education      | 2004–2008 | 64.2 (13, 274.7)   | 2008–2015 | 9.3 (-2.7, 30.2)    | 2015–2019 | -10.6 (-28.9, 1.6) | 15.5 (8.5, 33.0)  |
| First-generation immigrant females with low education     | 2004–2010 | 33.3 (10.4, 279.6) | 2010–2019 | -2.6 (-22.4, 5.0)   |           |                    | 10.4 (2.3, 31.5)  |
| First-generation immigrant females with medium education  | 2004–2011 | 32.2 (21.9, 55.1)  | 2011–2019 | -6 (-12.4, -1.4)    |           |                    | 10.2 (7.0, 15.6)  |
| First-generation immigrant females with high education    | 2004–2010 | 45.8 (21.8, 163.4) | 2010–2019 | 5.5 (-3.1, 10.9)    |           |                    | 20.1 (13.7, 33.3) |
| Second-generation immigrant males with low education      | 2004–2012 | 16.7 (9.2, 70.7)   | 2012–2019 | -3.4 (-16.9, 2.8)   |           |                    | 6.9 (2.7, 16.0)   |
| Second-generation immigrant males with medium education   | 2004–2009 | 45.0 (21.7, 121.4) | 2009–2019 | 0.9 (-5.1, 5.0)     |           |                    | 13.9 (8.8, 21.3)  |
| Second-generation immigrant males with high education     | 2004–2012 | 24.8 (15.5, 80)    | 2012–2019 | -3.4 (-19.2, 4.3)   |           |                    | 10.7 (5.8, 22.3)  |
| Second-generation immigrant females with low education    | 2004–2014 | 15.3 (6.4, 110.6)  | 2014–2019 | 0.2 (-22.0, 13.9)   |           |                    | 10.1 (5.8, 23.2)  |
| Second-generation immigrant females with medium education | 2004–2008 | 54.2 (32.3, 114.0) | 2008–2013 | 12.8 (-0.6, 24.2)   | 2013–2019 | 1.1 (-9.0, 8.8)    | 17.4 (14.2, 24.2) |
| Second-generation immigrant females with high education   | 2004–2009 | 72.6 (48.7, 138.8) | 2009–2019 | 5 (2.3, 7.8)        |           |                    | 23.9 (20.4, 31.7) |
| Native male low education                                 | 2004–2011 | 15.0 (9.4, 35.3)   | 2011–2019 | 0.7 (-5.0, 3.7)     |           |                    | 7.1 (4.9, 11.2)   |
| Native male medium education                              | 2004–2007 | 54.3 (34.7, 80.1)  | 2007–2013 | 9.4 (5.7, 14.8)     | 2013–2019 | 1.1 (-4.6, 3.4)    | 13.6 (11.8, 16.9) |
| Native male high education                                | 2004–2008 | 50.0 (24.1, 104.8) | 2008–2019 | 3.8 (0.3, 6.7)      |           |                    | 14.5 (10.9, 19.9) |
| Native female low education                               | 2004–2012 | 25.1 (20.1, 33.5)  | 2012–2019 | -0.8 (-5.1, 2.6)    |           |                    | 12.3 (10.4, 14.9) |
| Native female medium education                            | 2004–2007 | 65.7 (41.0, 96.8)  | 2007–2012 | 17.8 (9.3, 24.8)    | 2012–2019 | 4.6 (-0.2, 6.9)    | 19.3 (17.0, 23.1) |
| Native female high education                              | 2004–2012 | 25.4 (18.5, 57.1)  | 2012–2019 | 5.7 (-1.0, 10)      |           |                    | 15.8 (13.0, 23.5) |

APC: Annual percentage change; AAPC: Average annual percent change.

Numbers in parentheses show 95% confidence intervals.

**Table A7. Temporal changes in age-standardized rates of attention-deficit hyperactivity disorder and conduct disorder across sociodemographic strata defined by nativity, sex, and education, 2004-2019.**

| Stratum                                                   | Period 1  | APC 1               | Period 2  | APC 2             | Period 3  | APC 3               | AAPC (2004–2019)  |
|-----------------------------------------------------------|-----------|---------------------|-----------|-------------------|-----------|---------------------|-------------------|
| First-generation immigrant males with low education       | 2004–2008 | 56.5 (38.7, 97.6)   | 2008–2014 | 3.2 (-0.9, 10.3)  | 2014–2019 | -10.7 (-17.3, -7.0) | 9.9 (7.5, 14.1)   |
| First-generation immigrant males with medium education    | 2004–2008 | 61.0 (38.6, 138.3)  | 2008–2014 | 7.7 (3.4, 15.1)   | 2014–2019 | -5.0 (-12.1, -1.5)  | 15.0 (11.6, 22.4) |
| First-generation immigrant males with high education      | 2004–2011 | 30.5 (16.9, 84.2)   | 2011–2019 | 0.8 (-5.8, 5.3)   |           |                     | 13.7 (9.4, 23.9)  |
| First-generation immigrant females with low education     | 2004–2007 | 95.2 (53.8, 143.2)  | 2007–2013 | 5.8 (1.4, 12.7)   | 2013–2019 | -5.1 (-11.7, -2.2)  | 14.5 (10.9, 19.3) |
| First-generation immigrant females with medium education  | 2004–2007 | 95.3 (61.0, 123.0)  | 2007–2015 | 11.8 (9.5, 14.7)  | 2015–2019 | -5.2 (-9.6, -1.7)   | 19.6 (17.2, 22.8) |
| First-generation immigrant females with high education    | 2004–2007 | 107.8 (38.4, 273.4) | 2007–2012 | 28.7 (-4.2, 44.4) | 2012–2019 | 2.0 (-4.7, 9.9)     | 27.1 (19.7, 42.4) |
| Second-generation immigrant males with low education      | 2004–2008 | 65.2 (45.3, 99.3)   | 2008–2015 | 6.0 (3.1, 11.4)   | 2015–2019 | -8.1 (-15.2, -3.3)  | 14.8 (12.3, 18.5) |
| Second-generation immigrant males with medium education   | 2004–2007 | 94.7 (58.8, 162.2)  | 2007–2014 | 11.2 (7.4, 17.5)  | 2014–2019 | -2.5 (-9.4, 1.3)    | 19.1 (16.3, 26.2) |
| Second-generation immigrant males with high education     | 2004–2011 | 48.5 (38.2, 70.4)   | 2011–2019 | 5.2 (1.7, 8.3)    |           |                     | 23.5 (20.7, 29.3) |
| Second-generation immigrant females with low education    | 2004–2009 | 55.7 (42.2, 76.6)   | 2009–2016 | 3.5 (1.6, 8.2)    | 2016–2019 | -6.9 (-11.9, -1.3)  | 16.1 (13.8, 19.7) |
| Second-generation immigrant females with medium education | 2004–2008 | 82.4 (60.2, 149.5)  | 2008–2012 | 17.8 (9.2, 29.2)  | 2012–2019 | 3.9 (0.5, 5.7)      | 24.9 (21.9, 31.4) |
| Second-generation immigrant females with high education   | 2004–2010 | 58.6 (36.6, 144.7)  | 2010–2019 | 6.3 (1.2, 10.7)   |           |                     | 24.8 (19.9, 39.0) |
| Native male low education                                 | 2004–2008 | 70.8 (51.4, 97.4)   | 2008–2014 | 8.1 (5.2, 13.5)   | 2014–2019 | -2.6 (-9.3, 0.5)    | 18.0 (15.8, 22.0) |
| Native male medium education                              | 2004–2008 | 75.5 (44.1, 126.2)  | 2008–2019 | 4.3 (2.8, 5.8)    |           |                     | 19.8 (16.0, 27.2) |
| Native male high education                                | 2004–2007 | 90.6 (44.3, 183.5)  | 2007–2012 | 22.9 (6.2, 33.3)  | 2012–2019 | 4.0 (-0.8, 7.1)     | 24.1 (20.2, 34.1) |
| Native female low education                               | 2004–2009 | 67.4 (45.4, 118.7)  | 2009–2019 | 2.5 (-0.3, 5.2)   |           |                     | 20.7 (17.1, 28.1) |
| Native female medium education                            | 2004–2009 | 67.3 (49.6, 84.5)   | 2009–2019 | 6.1 (4.7, 7.6)    |           |                     | 23.5 (21.1, 27.5) |
| Native female high education                              | 2004–2007 | 99.9 (54.4, 168.3)  | 2007–2011 | 27.0 (7.4, 36.2)  | 2011–2019 | 6.6 (3.8, 8.6)      | 26.7 (23.1, 33.9) |

APC: Annual percentage change; AAPC: Average annual percent change.

Numbers in parentheses show 95% confidence intervals.

**Table A8. Cumulative age-standardized incidence rates (95% CI) of specific psychiatric disorders per 10,000 person years among people aged 25-46 years during 2004-2019 across sociodemographic strata defined by nativity, sex, and education.**

| Stratum                                                   | F10-F19           | F20, F23          | F32-F33             | F40-F41, F43         | F60, F63, F68     | F84               | F90-F91           |
|-----------------------------------------------------------|-------------------|-------------------|---------------------|----------------------|-------------------|-------------------|-------------------|
| First-generation immigrant males with low education       | 41.4 (40.0, 42.8) | 10.2 (9.5, 10.9)  | 39.0 (37.6, 40.3)   | 74.5 (72.5, 76.4)    | 7.6 (7.0, 8.2)    | 2.8 (2.5, 3.2)    | 9.7 (9.1, 10.4)   |
| First-generation immigrant males with medium education    | 31.6 (30.8, 32.5) | 7.1 (6.7, 7.5)    | 34.5 (33.6, 35.4)   | 56.7 (55.6, 57.8)    | 5.9 (5.5, 6.3)    | 1.9 (1.7, 2.1)    | 8.5 (8.1, 8.9)    |
| First-generation immigrant males with high education      | 12.8 (12.4, 13.3) | 3.1 (2.9, 3.3)    | 21.4 (20.8, 22.0)   | 34.5 (33.8, 35.3)    | 2.4 (2.2, 2.6)    | 1.1 (0.9, 1.2)    | 4.4 (4.2, 4.7)    |
| First-generation immigrant females with low education     | 16.0 (15.1, 16.9) | 7.3 (6.7, 7.9)    | 53.6 (51.9, 55.2)   | 95.2 (92.9, 97.4)    | 7.3 (6.7, 7.9)    | 1.7 (1.4, 2.0)    | 5.8 (5.3, 6.3)    |
| First-generation immigrant females with medium education  | 15.7 (15.0, 16.3) | 4.7 (4.3, 5.0)    | 52.2 (51.1, 53.4)   | 82.9 (81.4, 84.3)    | 7.2 (6.8, 7.6)    | 1.7 (1.5, 1.9)    | 7.1 (6.7, 7.6)    |
| First-generation immigrant females with high education    | 7.6 (7.2, 7.9)    | 2.9 (2.7, 3.1)    | 35.7 (34.9, 36.4)   | 58.1 (57.1, 59.0)    | 3.7 (3.4, 3.9)    | 1.1 (1.0, 1.2)    | 4.4 (4.2, 4.7)    |
| Second-generation immigrant males with low education      | 94.0 (90.4, 97.6) | 16.6 (15.1, 18.0) | 61.4 (58.6, 64.2)   | 101.1 (97.4, 104.7)  | 21.7 (20.0, 23.3) | 13.6 (12.3, 14.9) | 49.4 (46.9, 51.9) |
| Second-generation immigrant males with medium education   | 43.1 (41.9, 44.2) | 7.1 (6.7, 7.6)    | 39.0 (37.9, 40.1)   | 57.2 (55.9, 58.5)    | 8.7 (8.2, 9.2)    | 6.0 (5.5, 6.4)    | 21.1 (20.3, 21.9) |
| Second-generation immigrant males with high education     | 17.2 (16.4, 18.1) | 3.4 (3.1, 3.8)    | 28.2 (27.1, 29.2)   | 39.0 (37.7, 40.2)    | 4.5 (4.1, 5.0)    | 4.0 (3.6, 4.4)    | 9.9 (9.3, 10.6)   |
| Second-generation immigrant females with low education    | 70.7 (66.7, 74.8) | 12.6 (10.9, 14.2) | 103.5 (98.6, 108.4) | 169.4 (163.0, 175.9) | 35.2 (32.5, 37.9) | 14.1 (12.4, 15.8) | 55.0 (51.6, 58.4) |
| Second-generation immigrant females with medium education | 27.9 (26.9, 28.9) | 4.6 (4.2, 5.0)    | 63.6 (62.0, 65.2)   | 97.9 (95.9, 99.9)    | 15.3 (14.6, 16.1) | 5.2 (4.7, 5.6)    | 22.1 (21.2, 23.0) |
| Second-generation immigrant females with high education   | 12.0 (11.4, 12.6) | 2.7 (2.4, 3.0)    | 47.2 (45.9, 48.4)   | 74.0 (72.4, 75.6)    | 7.9 (7.4, 8.4)    | 3.0 (2.7, 3.3)    | 11.2 (10.6, 11.7) |
| Native male low education                                 | 67.0 (65.5, 68.4) | 9.9 (9.3, 10.4)   | 55.0 (53.7, 56.3)   | 86.9 (85.2, 88.6)    | 14.6 (13.9, 15.3) | 13.7 (13.0, 14.3) | 44.4 (43.2, 45.6) |
| Native male medium education                              | 26.4 (26.1, 26.8) | 3.7 (3.5, 3.8)    | 30.2 (29.8, 30.6)   | 43.1 (42.6, 43.5)    | 5.2 (5.1, 5.4)    | 4.5 (4.4, 4.7)    | 15.0 (14.7, 15.3) |
| Native male high education                                | 11.4 (11.1, 11.7) | 2.2 (2.1, 2.3)    | 21.8 (21.4, 22.2)   | 30.7 (30.3, 31.2)    | 2.7 (2.6, 2.9)    | 3.2 (3.1, 3.3)    | 6.7 (6.5, 6.9)    |
| Native female low education                               | 55.7 (53.8, 57.5) | 9.2 (8.5, 9.9)    | 93.0 (90.6, 95.4)   | 154.4 (151.2, 157.6) | 31.0 (29.7, 32.3) | 15.0 (14.1, 15.9) | 53.5 (51.7, 55.2) |
| Native female medium education                            | 19.1 (18.7, 19.4) | 2.8 (2.6, 2.9)    | 49.8 (49.2, 50.4)   | 75.4 (74.6, 76.1)    | 10.4 (10.1, 10.6) | 4.2 (4.0, 4.4)    | 17.1 (16.8, 17.5) |
| Native female high education                              | 8.0 (7.8, 8.2)    | 1.6 (1.5, 1.7)    | 35.4 (35.0, 35.8)   | 54.8 (54.3, 55.4)    | 4.8 (4.7, 5.0)    | 2.0 (1.9, 2.1)    | 7.3 (7.1, 7.5)    |



**Table A9. Average annual percent change in age-standardized rates of psychiatric disorders among people aged 25-46 years across sociodemographic strata defined by nativity, sex, and education, 2004-2019.**

| Stratum                                                   | F10–F19           | F20, F23           | F32–F33           | F40–F41, F43      | F60, F63, F68      | F84               | F90-F91           |
|-----------------------------------------------------------|-------------------|--------------------|-------------------|-------------------|--------------------|-------------------|-------------------|
| First-generation immigrant males with low education       | -2.0 (-3.1, -0.7) | -5.7 (-8.0, -4.0)  | -6.2 (-8.6, -4.2) | -3.3 (-5.2, -1.7) | -8.2 (-10.5, -6.2) | 0.3 (-3.4, 5.4)   | 8.4 (6.6, 11.1)   |
| First-generation immigrant males with medium education    | 0.0 (-1.4, 1.2)   | -3.6 (-5.2, -1.8)  | -4.2 (-6.0, -3.0) | -3.2 (-4.5, -2.0) | -4.9 (-6.9, -3.0)  | 5.8 (2.5, 11.3)   | 13.4 (11.4, 17.8) |
| First-generation immigrant males with high education      | -0.3 (-1.5, 1.2)  | -5.8 (-8.6, -3.0)  | -4.2 (-6.4, -2.5) | -2.8 (-3.9, -1.5) | -3.3 (-7.6, 0.6)   | 9.4 (4.5, 24.5)   | 14.2 (11.5, 21.2) |
| First-generation immigrant females with low education     | -3.2 (-4.8, -1.7) | -7.3 (-10.2, -4.6) | -7.7 (-9.7, -6.3) | -3.7 (-4.9, -2.7) | -9.7 (-12.0, -7.0) | 7.8 (-1.6, 32.0)  | 11.5 (7.6, 17.9)  |
| First-generation immigrant females with medium education  | -0.1 (-0.8, 0.7)  | -6.5 (-8.7, -4.6)  | -4.0 (-5.8, -2.7) | -0.8 (-2.5, 0.4)  | -3.4 (-5.9, -1.0)  | 6.6 (0.7, 16.6)   | 18.0 (15.1, 22.6) |
| First-generation immigrant females with high education    | -0.1 (-1.6, 1.7)  | -5.2 (-6.7, -3.7)  | -3.3 (-5.5, -1.3) | 0.0 (-1.4, 1.1)   | 0.5 (-4.9, 5.7)    | 17.1 (12.0, 28.1) | 25.4 (21.5, 31.6) |
| Second-generation immigrant males with low education      | -0.1 (-1.5, 0.9)  | -0.9 (-3.4, 1.6)   | 1.7 (-0.3, 3.6)   | -0.1 (-2.7, 2.6)  | -1.6 (-4.1, 0.8)   | 7.0 (3.8, 12.4)   | 13.8 (11.3, 17.3) |
| Second-generation immigrant males with medium education   | 0.7 (-0.7, 2.2)   | -1.4 (-3.8, 0.9)   | 1.3 (-0.8, 3.0)   | 1.0 (-0.2, 2.9)   | -2.2 (-4.8, 0.5)   | 11.9 (7.4, 20.9)  | 18.2 (15.7, 23.9) |
| Second-generation immigrant males with high education     | 2.6 (1.2, 4.5)    | -0.9 (-4.0, 1.6)   | 0.7 (-2.0, 4.6)   | 2.4 (1.1, 4.3)    | -0.6 (-3.0, 1.8)   | 10.0 (5.9, 17.3)  | 22.1 (19.7, 26.2) |
| Second-generation immigrant females with low education    | 0.2 (-1.4, 1.7)   | -5.3 (-9.8, -1.6)  | -0.4 (-2.2, 1.5)  | 1.4 (-0.2, 2.8)   | -4.0 (-6.6, -1.6)  | 10.2 (6.8, 19.9)  | 17.4 (15.7, 20.1) |
| Second-generation immigrant females with medium education | 1.8 (0.0, 3.7)    | -4.8 (-7.0, -2.9)  | 1.1 (-1.0, 2.5)   | 2.3 (0.7, 3.9)    | 2.6 (0.6, 4.6)     | 16.1 (12.0, 24.7) | 24.0 (21.0, 28.6) |
| Second-generation immigrant females with high education   | 2.0 (-0.4, 4.7)   | -3.9 (-8.1, 0.0)   | -0.1 (-1.9, 1.6)  | 4.0 (2.3, 6.1)    | 1.2 (-0.8, 3.5)    | 21.3 (19.0, 27.0) | 22.1 (18.2, 35.2) |
| Native male low education                                 | 1.5 (0.3, 2.4)    | -0.8 (-2.7, 0.8)   | 2.0 (0.6, 3.5)    | 1.6 (0.1, 3.0)    | -2.0 (-4.4, -0.2)  | 8.6 (5.9, 12.7)   | 17.6 (15.7, 20.7) |
| Native male medium education                              | 1.0 (0.6, 1.4)    | -1.8 (-2.9, -0.7)  | 1.3 (0.1, 2.4)    | 1.3 (0.3, 2.7)    | -0.4 (-2.8, 1.2)   | 11.9 (10.7, 13.8) | 21.8 (19.8, 24.8) |
| Native male high education                                | 2.9 (1.6, 5.4)    | -3.3 (-5.2, -1.6)  | 0.3 (-1.9, 3.0)   | 2.9 (2.1, 4.0)    | 0.8 (-2.6, 3.5)    | 11.0 (8.2, 16.2)  | 24.1 (21.9, 29.1) |
| Native female low education                               | 1.6 (0.8, 2.3)    | -3.0 (-4.8, -0.6)  | 1.0 (-0.1, 2.2)   | 1.8 (0.0, 3.2)    | 0.1 (-2.0, 1.5)    | 11.9 (10.0, 14.7) | 20.7 (17.1, 28.6) |
| Native female medium education                            | 2.3 (1.7, 2.9)    | -3.5 (-6.1, -1.6)  | 0.7 (-0.8, 1.9)   | 2.7 (1.2, 3.8)    | 3.1 (2.0, 4.1)     | 17.9 (15.3, 22.3) | 22.1 (20.0, 27.6) |
| Native female high education                              | 3.1 (1.9, 4.5)    | -2.9 (-4.2, -1.8)  | -1.8 (-3.3, -0.3) | 3.6 (2.7, 4.8)    | 2.6 (1.1, 3.8)     | 16.6 (14.2, 23.2) | 24.5 (22.0, 28.8) |

**Table A10. Cumulative age-standardized incidence rates (95% CI) of specific psychiatric disorders per 10,000 person-years among people aged 25-46 years in 2004 (closed cohort) across sociodemographic strata defined by nativity, sex, and education, 2004-2019.**

|                                                           | F10-F19           | F20, F23          | F32-F33           | F40-F41, F43         | F60, F63, F68     | F84            | F90-F91           |
|-----------------------------------------------------------|-------------------|-------------------|-------------------|----------------------|-------------------|----------------|-------------------|
| First-generation immigrant males with low education       | 39.1 (37.2, 41.0) | 10.1 (9.1, 11.0)  | 45.2 (43.2, 47.1) | 71.2 (68.6, 73.7)    | 9.2 (8.2, 10.1)   | 2.7 (2.2, 3.2) | 9.4 (8.5, 10.3)   |
| First-generation immigrant males with medium education    | 28.8 (27.9, 29.8) | 6.3 (5.8, 6.7)    | 39.1 (38.0, 40.2) | 57.5 (56.2, 58.9)    | 6.0 (5.6, 6.5)    | 1.6 (1.4, 1.8) | 6.9 (6.4, 7.4)    |
| First-generation immigrant males with high education      | 12.8 (12.1, 13.4) | 3.0 (2.7, 3.3)    | 27.6 (26.6, 28.5) | 38.3 (37.2, 39.5)    | 3.2 (2.9, 3.5)    | 1.2 (1.0, 1.4) | 3.7 (3.4, 4.1)    |
| First-generation immigrant females with low education     | 17.9 (16.7 (19.1) | 7.5 (6.7, 8.3)    | 68.2 (65.8, 70.6) | 99.5 (96.5, 102.4)   | 8.0 (7.2, 8.8)    | 1.4 (1.1, 1.8) | 5.7 (5.0, 6.4)    |
| First-generation immigrant females with medium education  | 16.3 (15.6, 17.0) | 4.9 (4.5, 5.3)    | 58.4 (56.9, 59.8) | 84.0 (82.3, 85.7)    | 6.8 (6.3, 7.3)    | 1.5 (1.3, 1.7) | 6.1 (5.6, 6.5)    |
| First-generation immigrant females with high education    | 8.3 (7.8, 8.8)    | 2.9 (2.6, 3.2)    | 41.6 (40.5, 42.7) | 62.7 (61.4, 64.1)    | 3.8 (3.5, 4.1)    | 1.1 (1.0, 1.3) | 3.8 (3.5, 4.2)    |
| Second-generation immigrant males with low education      | 70.9 (67.5, 74.3) | 11.6 (10.3, 12.9) | 46.3 (43.7, 48.9) | 75.6 (72.1, 79.0)    | 15.8 (14.3, 17.4) | 7.3 (6.3, 8.3) | 27.5 (25.5, 29.5) |
| Second-generation immigrant males with medium education   | 37.1 (36.0, 38.3) | 5.6 (5.2, 6.0)    | 32.4 (31.4, 33.4) | 46.4 (45.2, 47.7)    | 6.9 (6.4, 7.4)    | 3.5 (3.2, 3.9) | 13.7 (13.0, 14.3) |
| Second-generation immigrant males with high education     | 16.4 (15.5, 17.4) | 2.5 (2.2, 2.9)    | 23.7 (22.6, 24.8) | 32.8 (31.5, 34.1)    | 3.6 (3.2, 4.0)    | 2.7 (2.3, 3.0) | 5.9 (5.3, 6.4)    |
| Second-generation immigrant females with low education    | 59.3 (55.4, 63.1) | 11.3 (9.7, 13.0)  | 76.5 (72.1, 80.9) | 127.2 (121.4, 133.1) | 23.2 (20.8, 25.6) | 7.1 (5.9, 8.4) | 29.7 (27.0, 32.3) |
| Second-generation immigrant females with medium education | 24.3 (23.3, 25.3) | 4.1 (3.7, 4.5)    | 50.3 (48.9, 51.8) | 76.7 (74.9, 78.5)    | 9.9 (9.3, 10.5)   | 2.7 (2.3, 3.0) | 12.3 (11.6, 13.0) |
| Second-generation immigrant females with high education   | 11.9 (11.2, 12.6) | 2.4 (2.1, 2.7)    | 39.8 (38.5, 41.0) | 61.9 (60.3, 63.5)    | 5.7 (5.3, 6.2)    | 2.3 (2.0, 2.6) | 7.4 (6.9, 8.0)    |
| Native male low education                                 | 47.6 (46.4, 48.9) | 7.0 (6.6, 7.5)    | 37.2 (36.1, 38.3) | 57.8 (56.4, 59.1)    | 9.4 (8.9, 9.9)    | 6.1 (5.6, 6.5) | 20.6 (19.8, 21.4) |
| Native male medium education                              | 24.4 (24.0, 24.7) | 3.0 (2.8, 3.1)    | 24.7 (24.4, 25.1) | 35.1 (34.7, 35.5)    | 4.0 (3.8, 4.1)    | 2.5 (2.4, 2.6) | 8.9 (8.6, 9.1)    |
| Native male high education                                | 11.8 (11.5, 12.1) | 1.9 (1.8, 2.0)    | 19.2 (18.8, 19.6) | 27.1 (26.6, 27.5)    | 2.3 (2.2, 2.4)    | 2.2 (2.1, 2.4) | 4.4 (4.2, 4.6)    |
| Native female low education                               | 41.1 (39.5, 42.6) | 7.6 (7.0, 8.3)    | 64.8 (62.9, 66.8) | 105.4 (102.9, 108.0) | 18.2 (17.1, 19.3) | 6.1 (5.5, 6.7) | 24.6 (23.4, 25.7) |
| Native female medium education                            | 16.6 (16.3, 17.0) | 2.6 (2.5, 2.7)    | 38.6 (38.0, 39.1) | 58.9 (58.3, 59.6)    | 6.5 (6.2, 6.7)    | 2.0 (1.9, 2.1) | 8.8 (8.5, 9.0)    |
| Native female high education                              | 7.9 (7.7, 8.1)    | 1.6 (1.5, 1.7)    | 30.1 (29.7, 30.6) | 47.5 (46.9, 48.0)    | 3.2 (3.1, 3.4)    | 1.3 (1.3, 1.4) | 4.8 (4.6, 4.9)    |

**Table A11. Average annual percent change in age-standardized rates of psychiatric disorders among people aged 25-46 years in 2004 (closed cohort) across sociodemographic strata defined by nativity, sex, and education, 2004-2019.**

| Stratum                                                   | F10–F19           | F20, F23            | F32–F33            | F40–F41, F43      | F60, F63, F68       | F84                  | F90–F91           |
|-----------------------------------------------------------|-------------------|---------------------|--------------------|-------------------|---------------------|----------------------|-------------------|
| First-generation immigrant males with low education       | -2.5 (-4.7, -0.7) | -10.0 (-14.4, -6.4) | -5.0 (-7.3, -3.1)  | -3.8 (-7.2, -1.1) | -3.6 (-10.5, -0.1)  | -3.8 (-12.3, 4.1)    | 17.6 (12.8, 24.0) |
| First-generation immigrant males with medium education    | -1.4 (-3.5, -0.2) | -8.3 (-16.6, -5.3)  | -3.3 (-9.0, -0.9)  | -2.3 (-4.3, -0.6) | -9.2 (-15.8, -2.0)  | 1.2 (-7.4, 9.3)      | 17.1 (9.7, 26.0)  |
| First-generation immigrant males with high education      | -2.9 (-6.1, 1.0)  | -12.3 (-17.2, -8.1) | -5.9 (-8.8, -3.2)  | -3.2 (-5.9, -0.6) | 5.4 (-4.8, 10.6)    | 5.9 (-3.3, 21.9)     | 14.6 (8.3, 21.4)  |
| First-generation immigrant females with low education     | 2.2 (-5.2, 4.6)   | -9.2 (-13.2, -5.8)  | -7.3 (-11.5, -4.1) | -6.4 (-9.6, -3.8) | -12.3 (-18.5, -8.7) | -31.8 (-39.7, -21.4) | 11.4 (5.3, 18.8)  |
| First-generation immigrant females with medium education  | 0.9 (-3.3, 4.0)   | -8.8 (-13.7, -4.7)  | -2.7 (-5.7, -1.4)  | 0.7 (-2.9, 2.4)   | -10.0 (-18.0, 0.5)  | 9.4 (-0.8, 20.2)     | 21.5 (12.8, 30.1) |
| First-generation immigrant females with high education    | 0.2 (-2.0, 2.7)   | -5.5 (-9.3, -2.7)   | -1.9 (-8.5, 1.8)   | 0.2 (-1.1, 1.5)   | 5.0 (-3.4, 9.2)     | 20 (8.6, 37.3)       | 29.4 (17.9, 45.1) |
| Second-generation immigrant males with low education      | -3.1 (-5.3, -1.4) | -8.1 (-10.6, -6.3)  | -0.7 (-5.1, 2.9)   | -0.2 (-3.1, 1.5)  | 0.8 (-4.9, 5.3)     | 0.0 (-10.1, 16.1)    | 11.0 (5.0, 15.8)  |
| Second-generation immigrant males with medium education   | -2.3 (-3.7, -1.0) | -0.3 (-6.4, 3.4)    | -2.5 (-3.9, -1.2)  | -0.2 (-1.8, 1.3)  | -10.8 (-17.2, -1.8) | 9.8 (-0.3, 20.7)     | 18.6 (13.9, 23.5) |
| Second-generation immigrant males with high education     | 1.0 (-1.5, 3.7)   | -8.0 (-16.4, -1.0)  | -3.2 (-8.4, 3.5)   | 2.4 (-3.1, 6.9)   | -7.6 (-16.5, 8.4)   | 6.0 (0.9, 12.5)      | 22.6 (15.4, 34.3) |
| Second-generation immigrant females with low education    | 0.8 (-6.4, 5.0)   | -7.4 (-13.3, -2.8)  | 0.5 (-4.2, 2.5)    | 1.6 (-6.3, 4.8)   | -11.4 (-21.5, -3.8) | 1.6 (-6.6, 11.6)     | 15.4 (10.2, 23.3) |
| Second-generation immigrant females with medium education | 0.1 (-2.5, 2.4)   | -8.4 (-12.4, -5.2)  | -1.9 (-5.0, 0.6)   | 3.4 (1.5, 5.4)    | -3.7 (-7.0, -1.0)   | 8.2 (4.1, 15.0)      | 19.4 (15.6, 24.7) |
| Second-generation immigrant females with high education   | 0.5 (-2.1, 3.4)   | -7.4 (-12.9, -2.3)  | -1.1 (-5.7, 1.5)   | 3.7 (1.3, 6.2)    | 3.4 (-2.5, 6.8)     | 14.6 (8.4, 23.6)     | 26.3 (19.3, 37.4) |
| Native male low education                                 | -2.0 (-3.6, -0.8) | -4.5 (-6.6, -2.8)   | 0.8 (-4.1, 2.7)    | 0.5 (-4.3, 2.2)   | -6.3 (-11.9, -2.4)  | 0.2 (-3.6, 2.7)      | 14.2 (10.5, 17.6) |
| Native male medium education                              | -1.2 (-3.0, 0.2)  | -5.2 (-8.8, -1.9)   | -1.0 (-3.2, 0.6)   | 0.6 (-1.8, 1.9)   | -4.5 (-6.8, -2.5)   | 10.4 (7.7, 12.3)     | 18.1 (13.6, 29.7) |
| Native male high education                                | 3.9 (0.1, 6.9)    | -5.8 (-10.9, -2.4)  | -2.4 (-5.3, 0.3)   | 1.3 (-1.8, 5.3)   | -2.1 (-4.5, 0.3)    | 13.4 (5.7, 21.4)     | 20.9 (14.3, 31.6) |
| Native female low education                               | -1.1 (-2.6, 0.1)  | 1.7 (-5.9, 6.7)     | -1.0 (-7.2, 1.4)   | -0.4 (-3.0, 0.8)  | -3.4 (-7.9, -1.7)   | 14.3 (10.8, 17.2)    | 18.0 (13.1, 25.0) |
| Native female medium education                            | 1.1 (0.2, 1.8)    | -7.8 (-11.5, -4.7)  | -0.8 (-8.2, 2.0)   | 0.4 (-1.6, 2.0)   | -0.3 (-5.9, 1.8)    | 18.0 (15.1, 21.2)    | 22.5 (19.0, 27.6) |
| Native female high education                              | 1.5 (-0.3, 3.6)   | -6.0 (-8.1, -4.0)   | -5.2 (-8.1, -2.9)  | 3.0 (1.1, 4.9)    | -1.2 (-5.9, 1.5)    | 15.2 (9.7, 21.6)     | 26.1 (21.4, 33.8) |
